# Supplementary material
Source: PubMed Central journal article supplement (PMC4060446)
Supplement: NIHMS576683-supplement-Supplemental_Figure_1.pdf [file NIHMS576683-supplement-Supplemental_Figure_1.pdf]

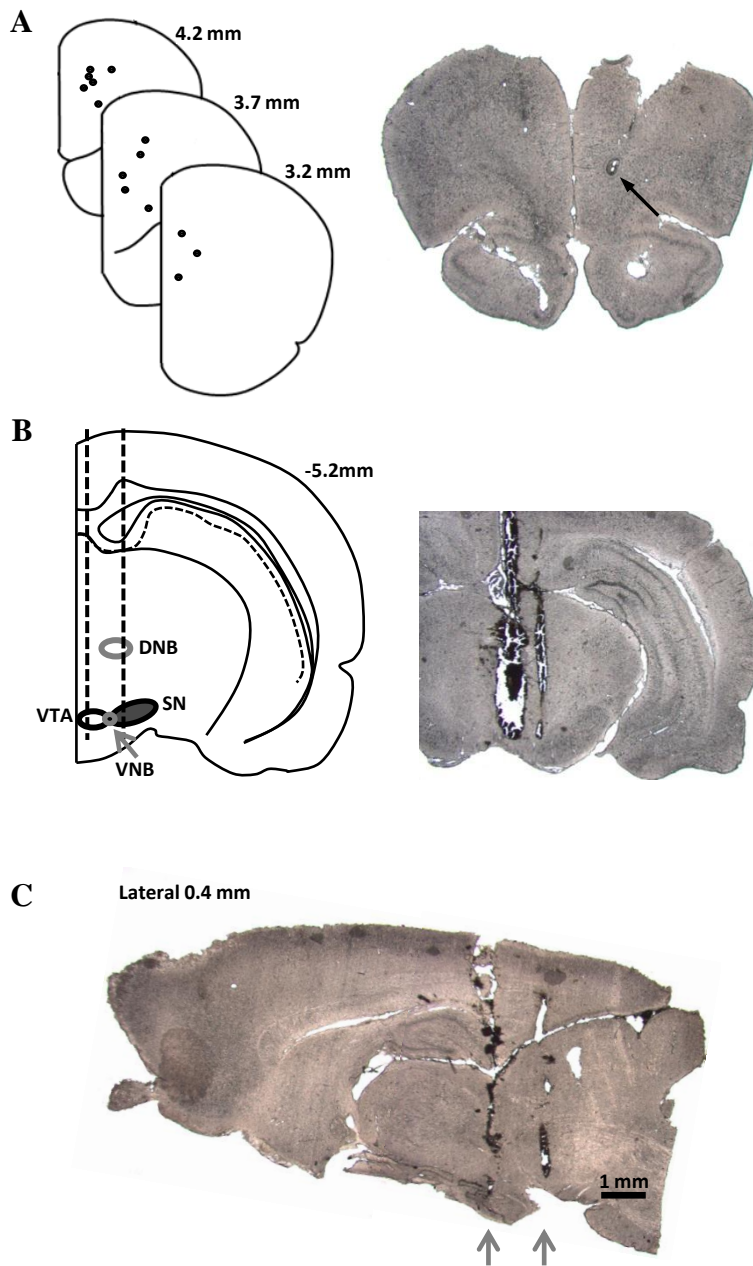

**Supplemental Figure 1.** Representation of electrode and knife placements during experiments. Panels A and B: On the left - schematic coronal sections adapted from the Paxinos and Watson (1998) rat brain atlas. Dots indicate position of the carbon-fiber electrodes in the mPFC (A) and dashed lines indicate tracks of bipolar stimulating electrodes in the VTA (B). On the right - histological verification of a recording site in the mPFC (A) and stimulation site in the midbrain (B) in tissue from representative rats. Panel C: Histological verification of the knife placement (left arrow) anterior to the stimulating electrode (right arrow). Abbreviations: DNB and VNB, dorsal and ventral norepinephrine bundles; SN, substantia nigra; VTA, ventral tegmental area.
